# Supplementary material for: Effect of lncRNA WT1-AS regulating WT1 on oxidative stress injury and apoptosis of neurons in Alzheimer's disease via inhibition of the miR-375/SIX4 axis
Source: publisher site journal article supplement (doi:10.18632/aging.104079), 2020-11-21
Supplement: Supplementary file [file aging-v12i23-104079-supplementary-material-SD1.pdf]

## SUPPLEMENTARY FIGURE

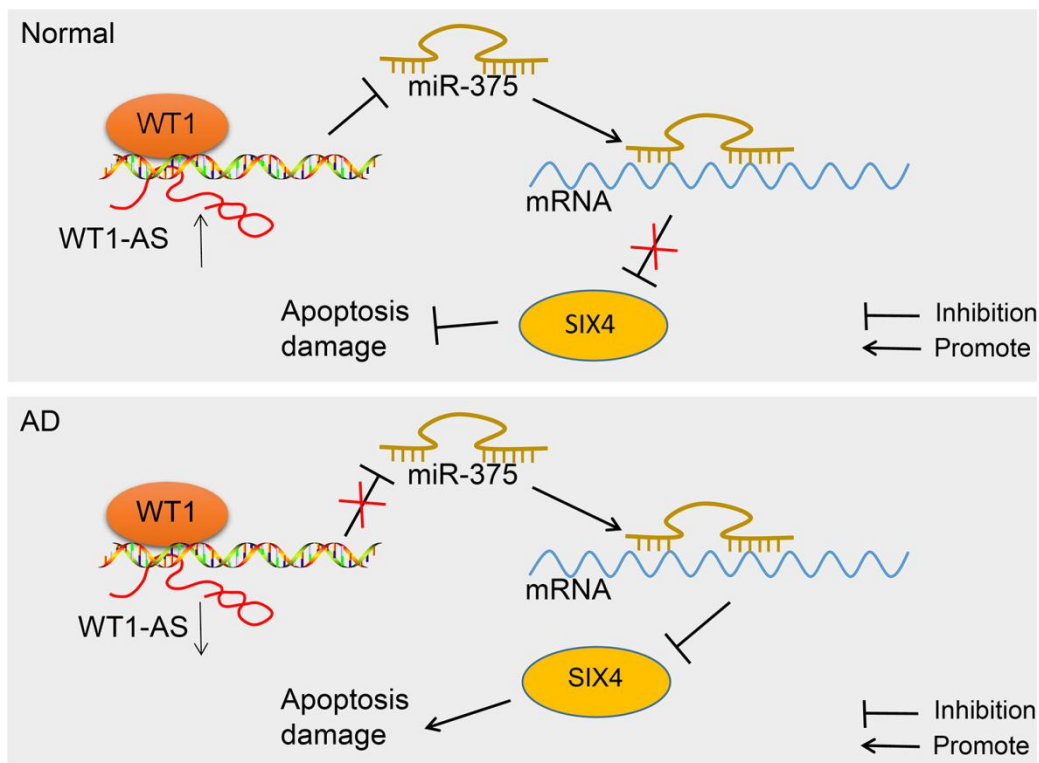

Supplementary Figure 1. WT1-AS was expressed at low levels in AD, and low expression of WT1-AS could promote the expression of the transcription factor WT1, thus promoting miR-375, inhibiting the expression of SIX4 and promoting oxidative stress injury and apoptosis of neurons in AD.
